# Supplementary material for: Magnetic chitosan/TiO2 composite for vanadium(v) adsorption simultaneously being transformed to an enhanced natural photocatalyst for the degradation of rhodamine B
Source: Royal Society of Chemistry journal article supplement (doi:10.1039/d3ra00492a), 2023-01-01
Supplement: d3ra00492a1.pdf [file d3ra00492a1.pdf]

# **Magnetic Chitosan/TiO<sub>2</sub> Composite for V(V) Adsorption Simultaneously Being Transformed an Enhanced Natural Photocatalyst for Degradation of Rhodamine B**

Jun Zhang<sup>1,2</sup>, Xuxu Wei<sup>1,2</sup>, Caixia Yuan<sup>1,2</sup>, Zifan Zhang<sup>1,2</sup>, Ting Huo<sup>4</sup>, Fangfang Niu<sup>1,2</sup>, Xiaoyu Lin<sup>1,2</sup>, Chunli Liu<sup>1,2</sup>, Hui Li<sup>1,2</sup> and Zhenbin Chen<sup>\*1,2</sup>

<sup>1</sup>State Key Laboratory of Advanced Processing and Recycling of Nonferrous Metals, Lanzhou University of Technology, Lanzhou 730050, Gansu, China

<sup>2</sup>School of Materials Science and Engineering, Lanzhou University of Technology, Lanzhou 730050, Gansu, China.

<sup>3</sup>State Key Laboratory of Nickel and Cobalt Resources Comprehensive Utilization, Jinchang 737100, GanSu, Chana.

<sup>4</sup>CAS Key Laboratory of Chemistry of Northwestern Plant Resources, Lanzhou Institute of Chemical Physics, Chinese Academy of Sciences (CAS), Lanzhou 730000, China

### 1. Determination of the maximum absorption wavelength

The RhB solution was scanned by a UV-752N spectrophotometer in the range of 180-1020 nm to obtain the maximum absorption wavelength. The 4 mg/L RhB solution was added into a 1cm quartz cuvette for direct measurement, with water as reference. It showed in **Figure S1 (a)**, the maximum absorption wavelength was 540 nm.

### 2. Determination of the standard curve

Prepared a series of RhB solutions (the concentrations were 1, 2, 4, 8, 12, 16 and 20 mg/L, respectively), which added into a 1cm quartz cuvette at the maximum absorption wavelength (540 nm) for direct measurement, with water as reference. **Fig. S1 (b)** showed the standard curve of Rhodamine B at 540 nm.

### 3. Figures

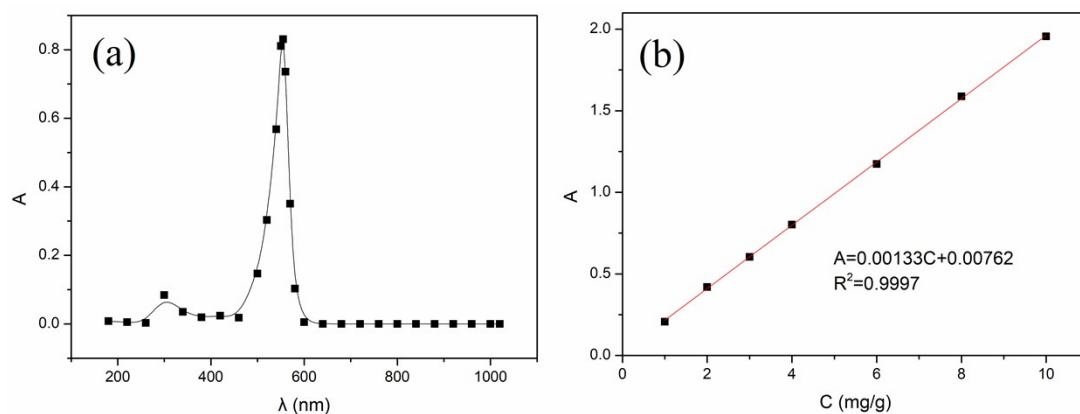

**Fig. S1.**The (a) maximum absorption wavelength and (b) standard curve of RhB solutions.

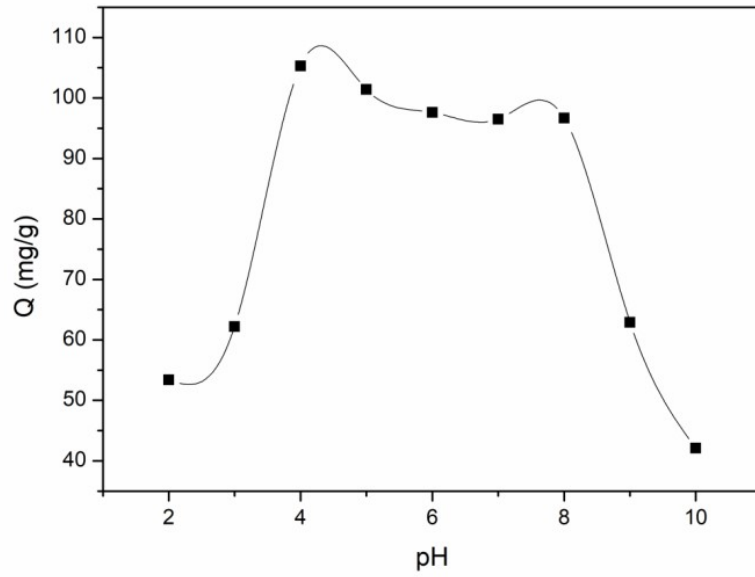

**Fig. S2.** The Influence of the pH value on adsorption capacity of V(V) with MCT.

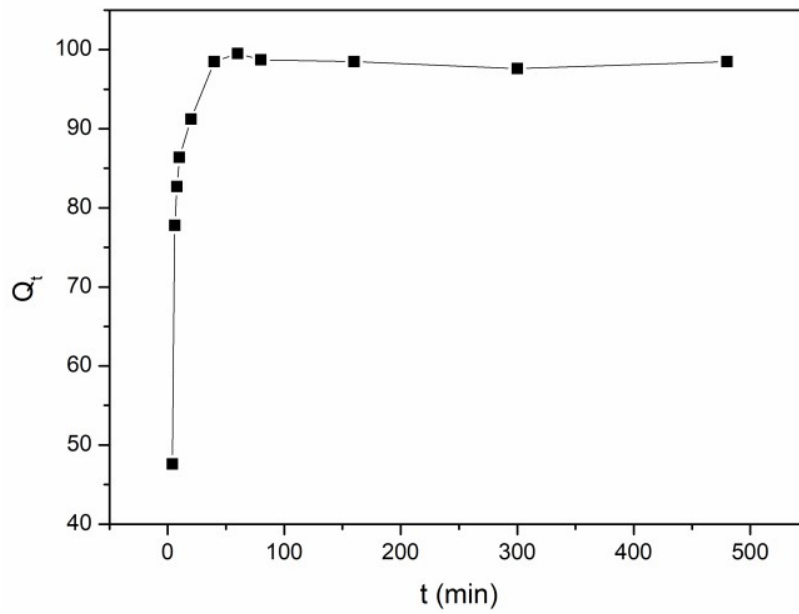

**Fig. S3.** The Influence of contact time on the adsorption V(V) by MCT.

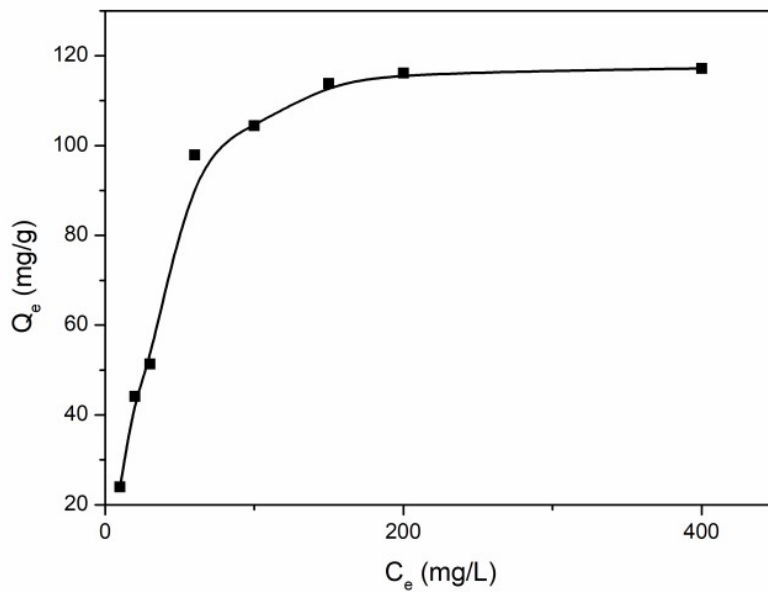

**Fig. S4.** The adsorption isotherm of V(V) by using MCT.

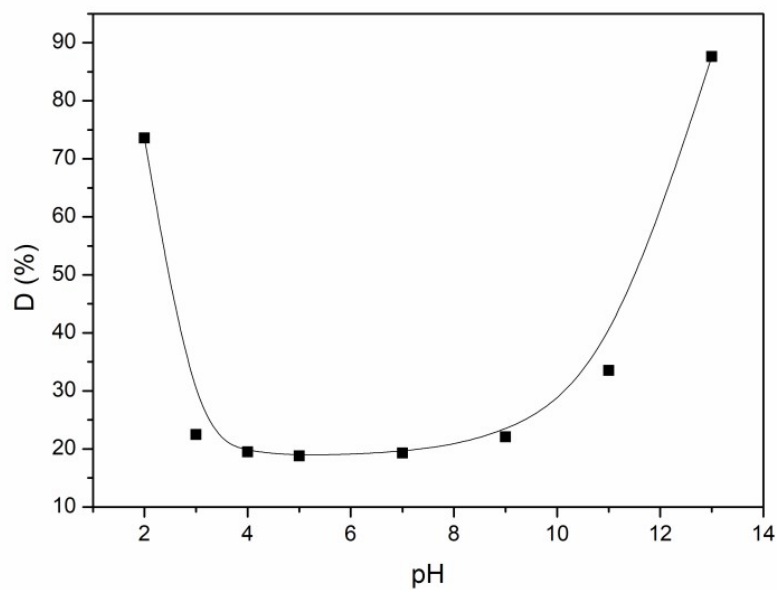

**Fig. S5.** The Influence of pH on the desorption rate of adsorbed V(V) by MCT.

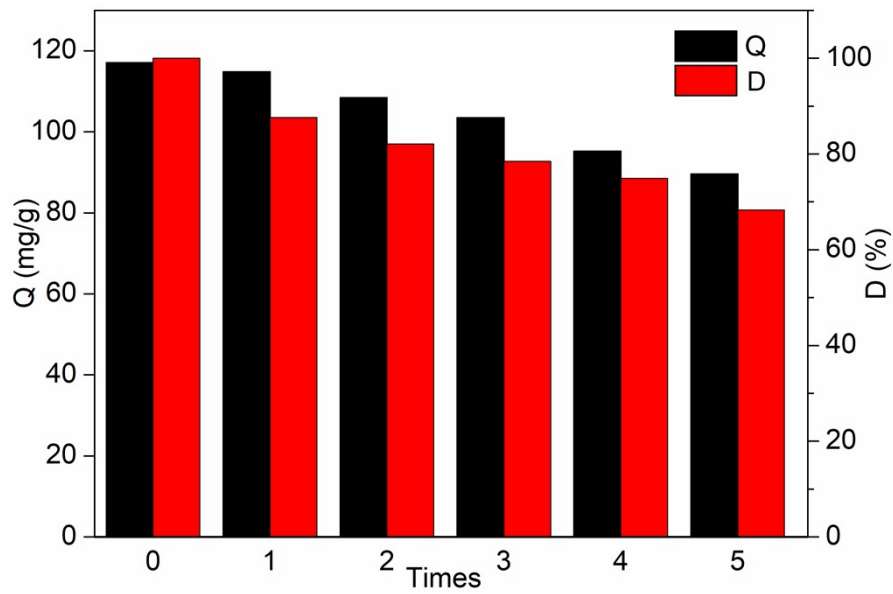

**Fig. S6.** The Influence of cyclic times on the adsorption capacity and desorption rate of V(V).

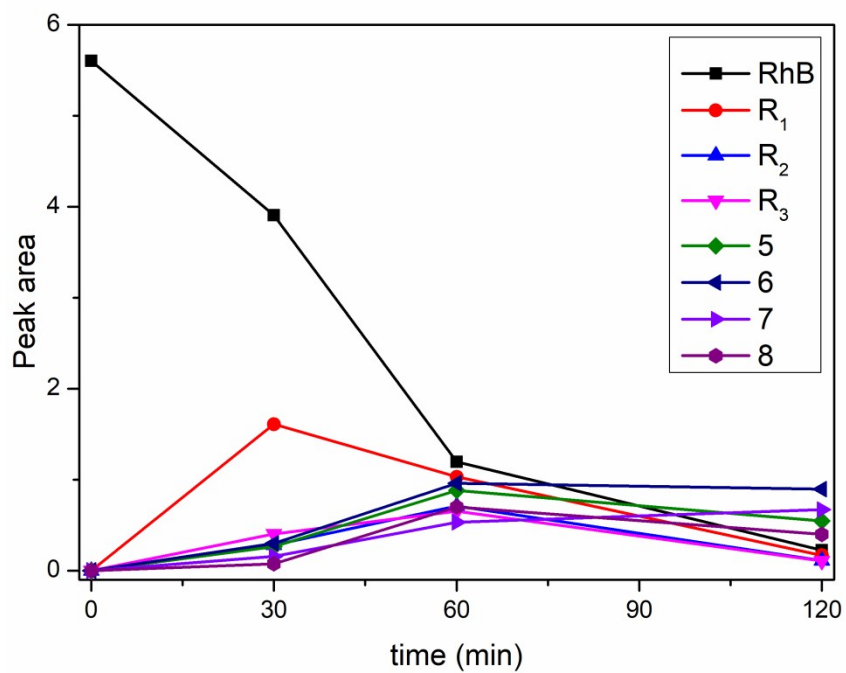

**Fig. S7.** The peak areas for the intermediates, recorded by HPLC 480 nm wavelength.
